# Supplementary material for: Normalization of charge/discharge time vs. current rate diagrams for rechargeable batteries
Source: Royal Society of Chemistry journal article supplement (doi:10.1039/d3cp04815b), 2024-01-01
Supplement: d3cp04815b1.pdf [file d3cp04815b1.pdf]

## Supporting Information

### Normalization of charge/discharge time vs. current rate diagrams for the rechargeable batteries

Elham Shahpouri<sup>[a]</sup>, Naghmeh Abavi-Torghabeh<sup>[a]</sup>, Mohammad Mahdi Kalantarian<sup>[a]\*</sup>, Piercarlo Mustarelli<sup>[b]\*</sup>

---

[a] Department of Ceramic, Materials and Energy Research Center, PO Box 31787-316, Karaj, Iran.

E-mails: kalantarian@gmail.com, m.kalantarian@merc.ac.ir

[b] Department of Materials Science, University of Milano-Bicocca, and GISEL-INSTM, Viale Cozzi 55, 20125, Milano, Italy.

E-mail: piercarlo.mustarelli@unimib.it

**Keywords:** charge/discharge behaviour, Li- and Na-ion batteries, rate capability, performance, standardization and normalization

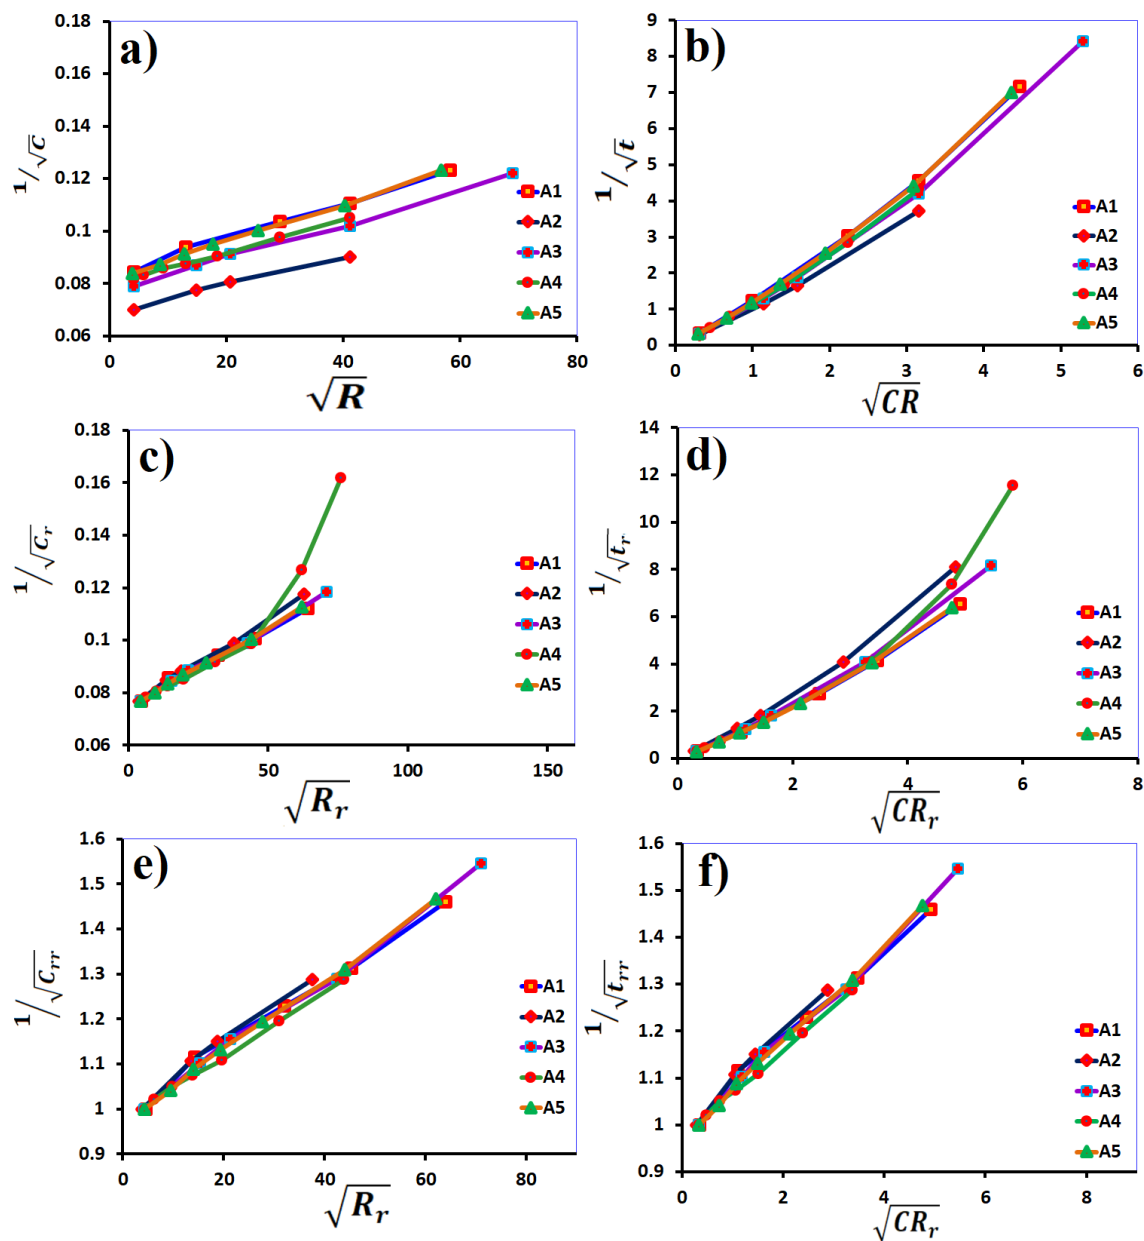

**Figure S1.** Ordinary (a and b), standardization (c and d), and normalization (e and f) capacity- and time- based diagrams, respectively. A samples (corresponding to Figure 1 of the article) stand for  $\text{LiFePO}_4/\text{C}$  electrode materials. The data are taken from the following references: A1,<sup>1</sup> A2,<sup>2</sup> A3,<sup>3</sup> A4,<sup>4</sup> and A5<sup>5</sup>.

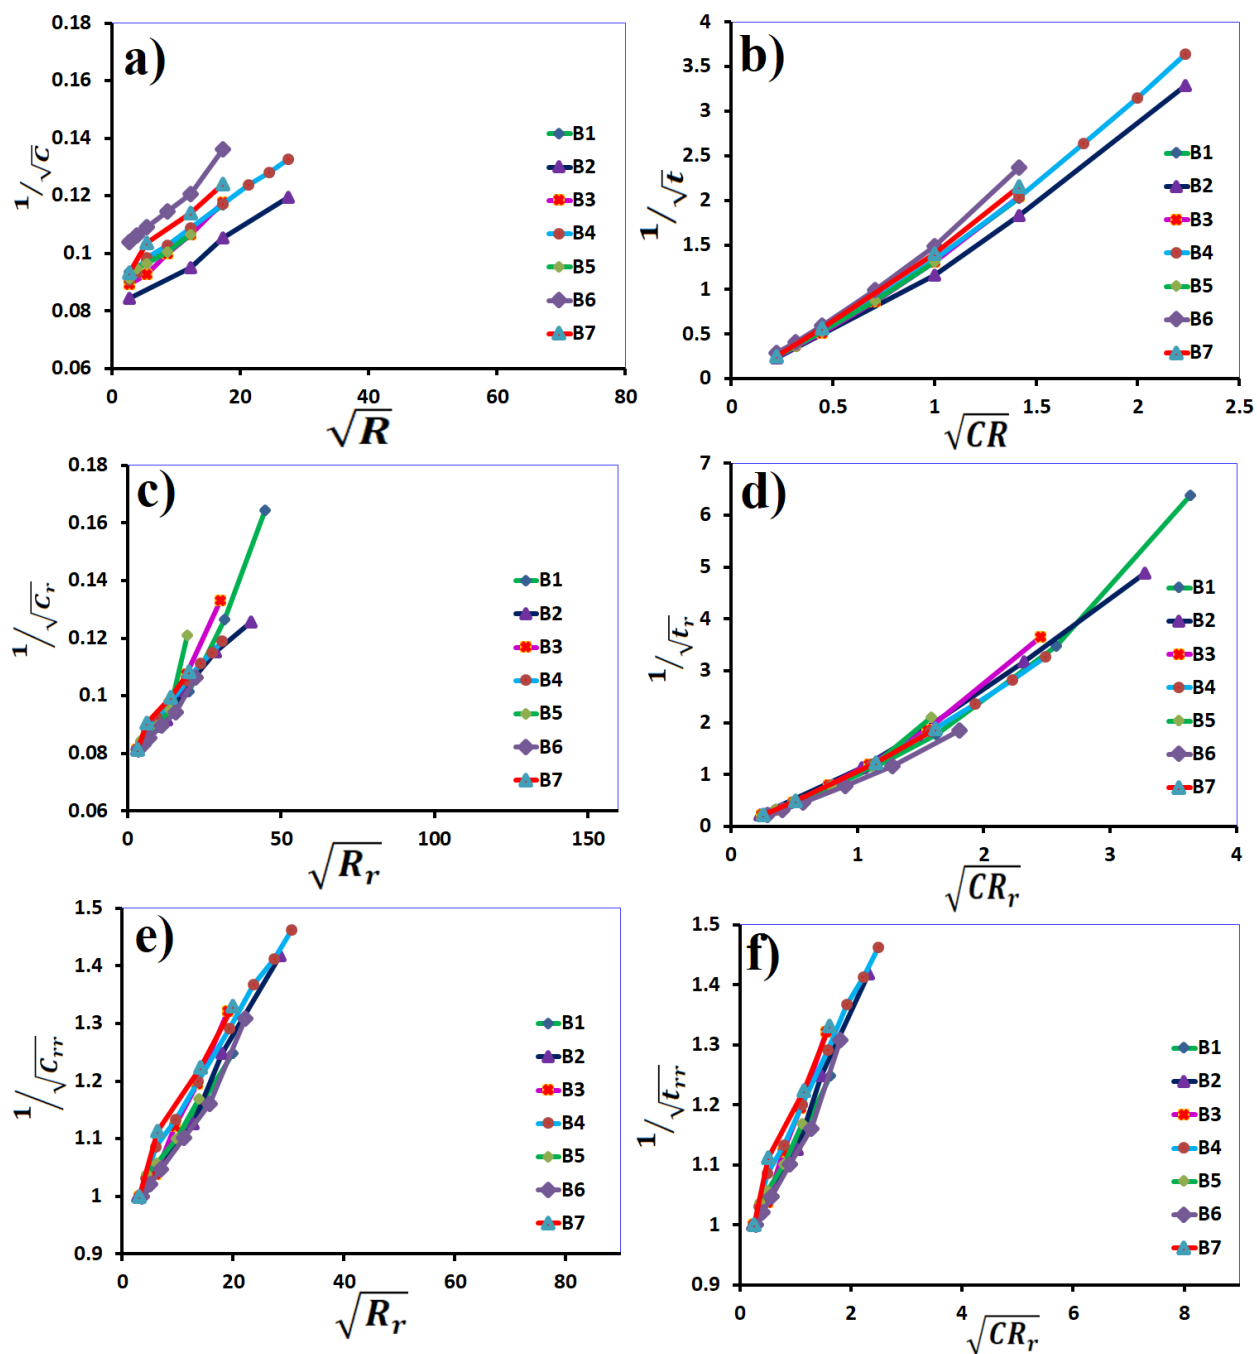

**Figure S2.** Ordinary (a and b), standardization (c and d), and normalization (e and f) capacity- and time- based diagrams, respectively. B samples (corresponding to Figure 1 of the article) stand for  $\text{LiFeSO}_4\text{F}$  electrode materials. The data are taken from the following references: B1,<sup>6</sup> B2,<sup>7</sup> B3,<sup>8</sup> B4,<sup>9</sup> B5,<sup>10</sup> B6,<sup>11</sup> and B7<sup>12</sup>.

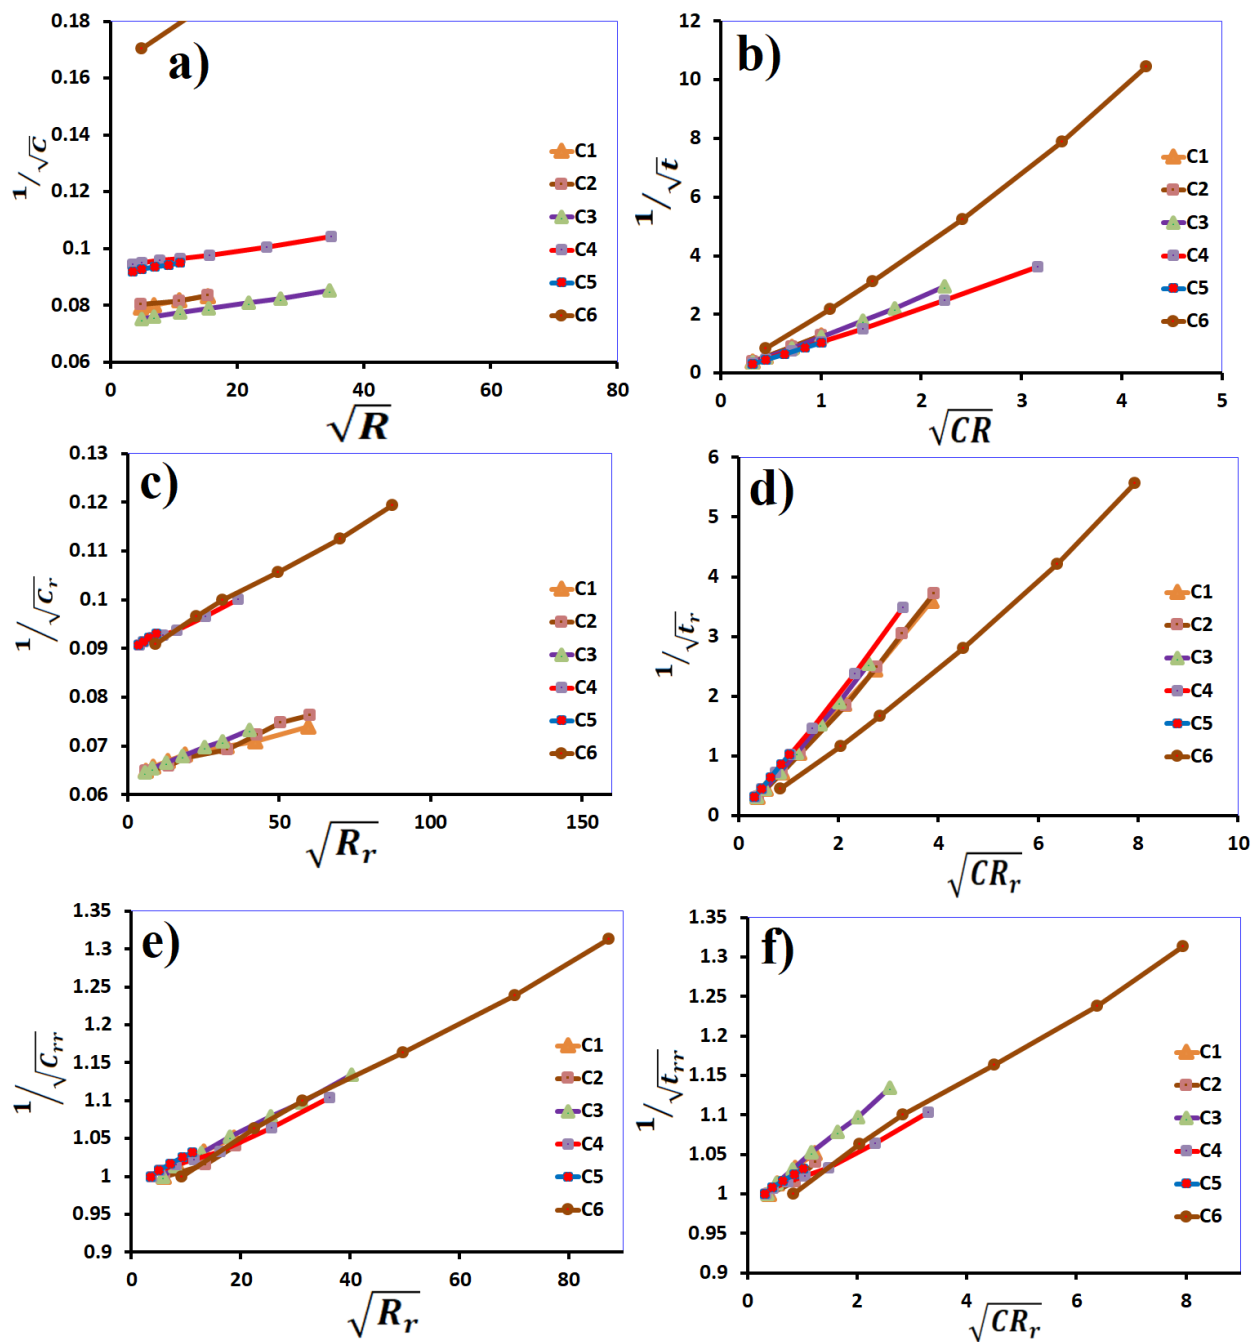

**Figure S3.** Ordinary (a and b), standardization (c and d), and normalization (e and f) capacity- and time- based diagrams, respectively. C samples (corresponding to Figure 1 of the article) stand for Na-ion batteries. The data are taken from the following references: C1,<sup>13</sup> C2,<sup>14</sup> C3,<sup>15</sup> C4,<sup>16</sup> C5,<sup>17</sup> C6,<sup>18</sup> and C7<sup>18</sup>.

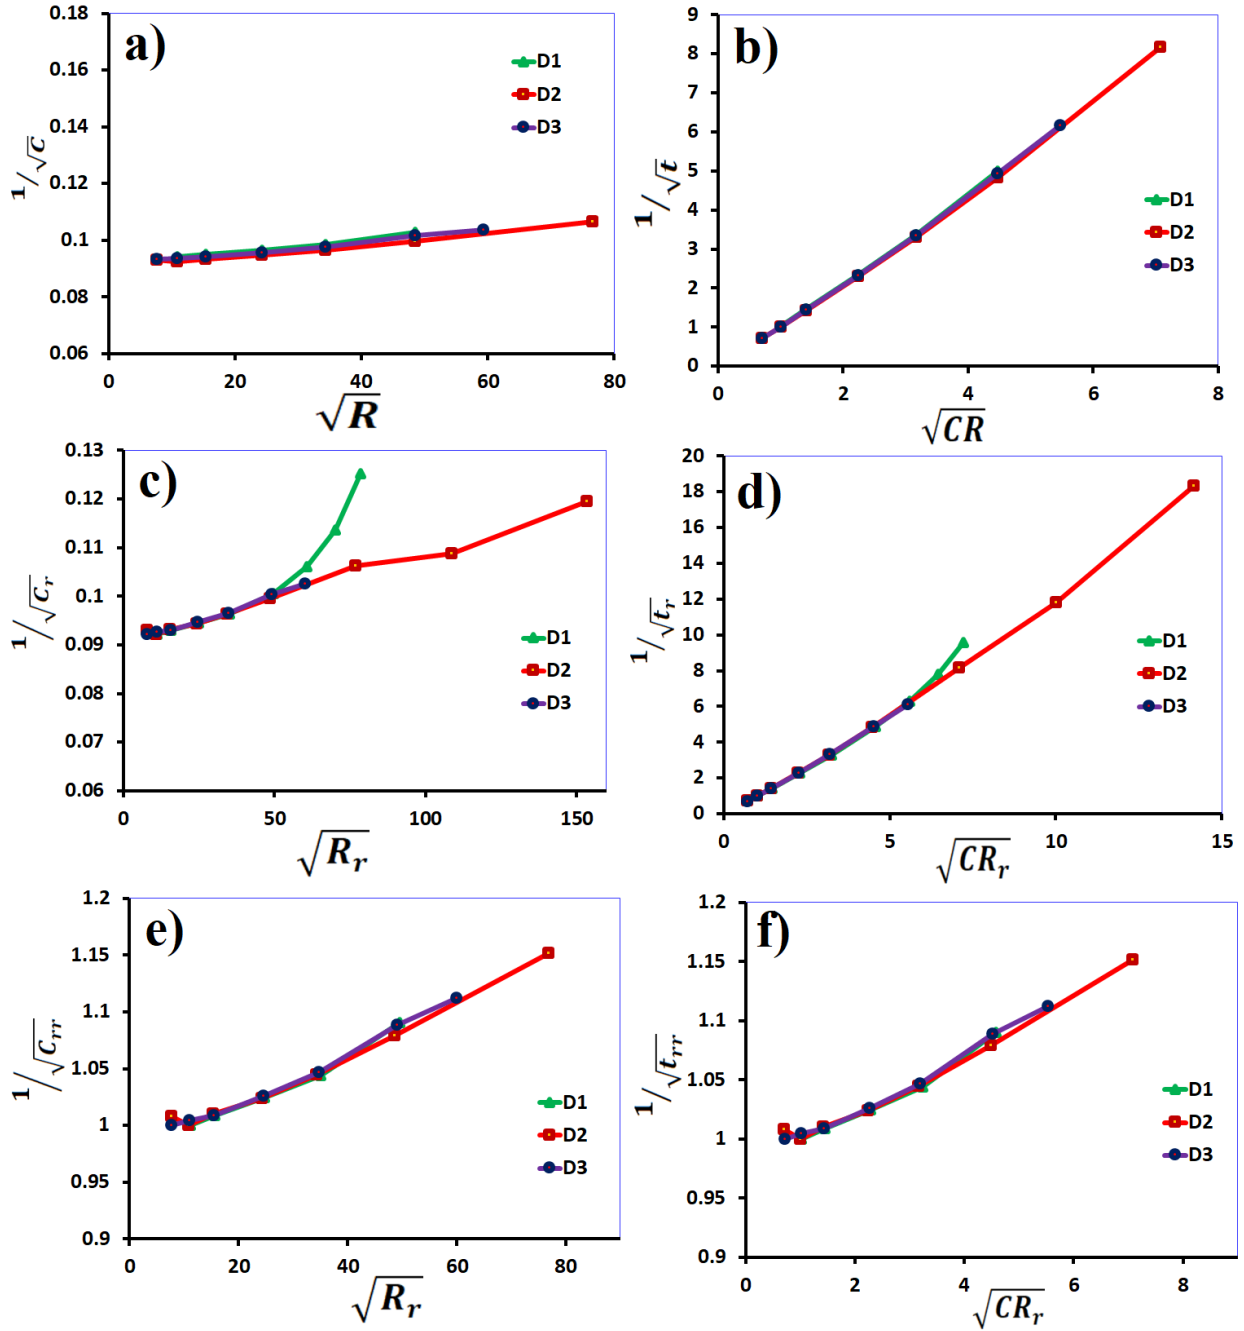

**Figure S4.** Ordinary (a and b), standardization (c and d), and normalization (e and f) capacity- and time- based diagrams, respectively. C samples (corresponding to Figure 1 of the article) stand for  $\text{Na}_3\text{V}_2(\text{PO}_4)_3$  (NVP) electrode materials. The data are taken from the following references: D1,<sup>19</sup> D2,<sup>10</sup> and D3<sup>20</sup>.

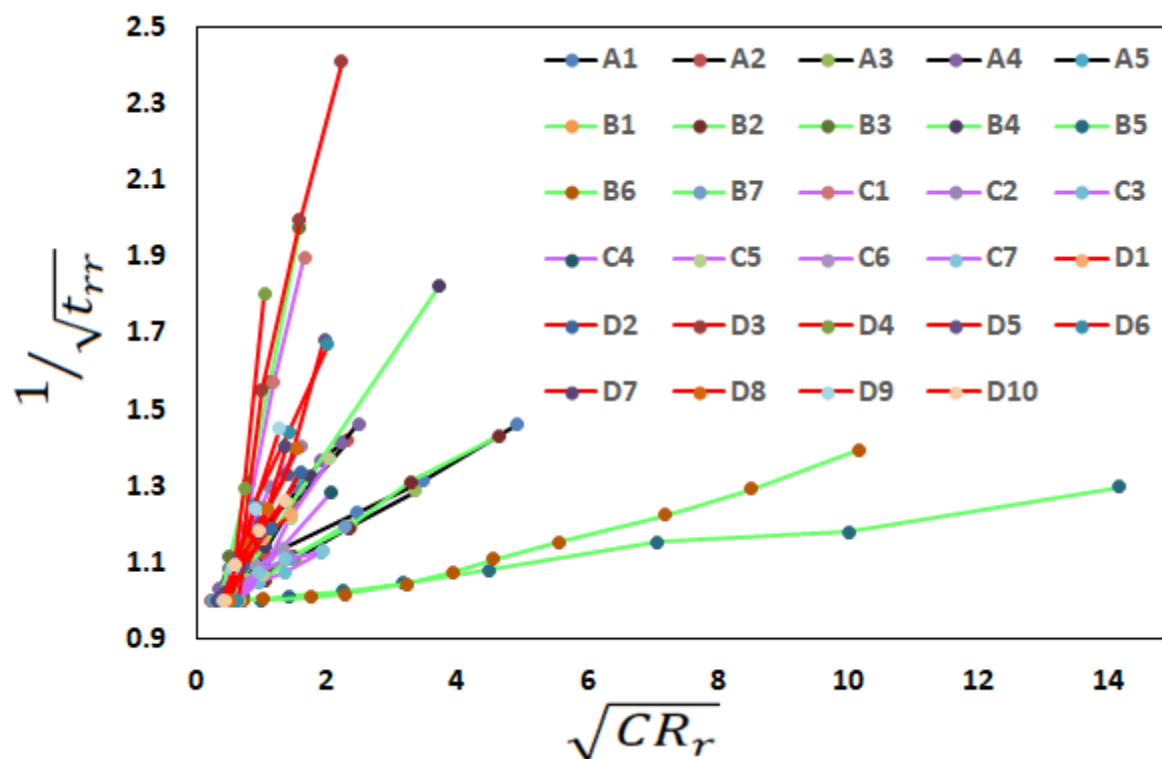

**Figure S5:**  $\sqrt{CR_r} - 1/\sqrt{t_{rr}}$  diagram corresponding to Figure 2b of the paper. The data are taken from the following references: A1,<sup>1</sup> A2,<sup>2</sup> A3,<sup>3</sup> A4,<sup>4</sup> A5,<sup>5</sup> B1,<sup>6</sup> B2,<sup>7</sup> B3,<sup>8</sup> B4,<sup>9</sup> B5,<sup>10</sup> B6,<sup>11</sup> B7,<sup>12</sup> C1,<sup>13</sup> C2,<sup>14</sup> C3,<sup>15</sup> C4,<sup>16</sup> C5,<sup>17</sup> C6,<sup>18</sup> C7,<sup>18</sup> D1,<sup>21</sup> D2,<sup>22</sup> D3,<sup>23</sup> D4,<sup>23</sup> D5,<sup>24</sup> D6,<sup>24</sup> D7,<sup>25</sup> D8,<sup>26</sup> D9,<sup>27</sup> and D10.<sup>28</sup>

## References

1. B. Zhao, X. Yu, R. Cai, R. Ran, H. Wang and Z. Shao, *Journal of Materials Chemistry*, 2012, **22**, 2900-2907.
2. M. Kim, Y. Jung and B. Kang, *Journal of Materials Chemistry A*, 2015, **3**, 7583-7590.
3. C. Sun, S. Rajasekhara, J. B. Goodenough and F. Zhou, *Journal of the American Chemical Society*, 2011, **133**, 2132-2135.
4. D. H. Seo, K. Y. Park, H. Kim, S. K. Jung, M. S. Park and K. Kang, *Advanced Energy Materials*, 2018, **8**, 1701408.
5. S. J. Kim, B. Lee, K.-Y. Lee, B. W. Cho and S. H. Oh, *Journal of Power Sources*, 2018, **398**, 27-33.
6. B. Ali, F. Ghafoor, M. I. Shahzad, S. K. Shah and S. M. Abbas, *Journal of Power Sources*, 2018, **396**, 467-475.
7. Y. Liu, N. Zhang, F. Wang, X. Liu, L. Jiao and L. Z. Fan, *Advanced Functional Materials*, 2018, **28**, 1801917.
8. Y. Bai, X. Zhang, X. Wang, Z. Luo and G. Chen, *Journal of Power Sources*, 2019, **430**, 120-129.

9. A. Langrock, Y. Xu, Y. Liu, S. Ehrman, A. Manivannan and C. Wang, *Journal of Power Sources*, 2013, **223**, 62-67.
10. Y. Xu, Q. Wei, C. Xu, Q. Li, Q. An, P. Zhang, J. Sheng, L. Zhou and L. Mai, *Advanced Energy Materials*, 2016, **6**, 1600389.
11. Q. Liu, X. Meng, Z. Wei, D. Wang, Y. Gao, Y. Wei, F. Du and G. Chen, *ACS applied materials & interfaces*, 2016, **8**, 31709-31715.
12. Y. Liu, X. Liu, F. Bu, X. Zhao, L. Wang, Q. Shen, J. Zhang, N. Zhang, L. Jiao and L.-Z. Fan, *Electrochimica Acta*, 2019, **313**, 122-130.
13. S. Bag, C. Zhou, P. J. Kim, V. G. Pol and V. Thangadurai, *Energy Storage Materials*, 2020, **24**, 198-207.
14. Y. Yang, H. Xu, S. Wang, Y. Deng, X. Qin, X. Qin and G. Chen, *Electrochimica Acta*, 2019, **297**, 641-649.
15. J.-Q. Huang, Q. Zhang, H.-J. Peng and F. Wei, 2014.
16. J. Li, W. Xie, S. Zhang, S.-M. Xu and M. Shao, *Journal of Materials Chemistry A*, 2021, **9**, 11151-11159.
17. Z. Xing, G. Li, S. Sy and Z. Chen, *Nano Energy*, 2018, **54**, 1-9.
18. M. Yu, Z. Wang, Y. Wang, Y. Dong and J. Qiu, *Advanced Energy Materials*, 2017, **7**, 1700018.
19. L. Chen, Y. Zhao, S. Liu and L. Zhao, *ACS applied materials & interfaces*, 2017, **9**, 44485-44493.
20. Y. Jiang, Z. Yang, W. Li, L. Zeng, F. Pan, M. Wang, X. Wei, G. Hu, L. Gu and Y. Yu, *Advanced Energy Materials*, 2015, **5**, 1402104.
21. H. Ye, L. Ma, Y. Zhou, L. Wang, N. Han, F. Zhao, J. Deng, T. Wu, Y. Li and J. Lu, *Proceedings of the National Academy of Sciences*, 2017, **114**, 13091-13096.
22. Z. Qiang, Y.-M. Chen, Y. Xia, W. Liang, Y. Zhu and B. D. Vogt, *Nano Energy*, 2017, **32**, 59-66.
23. Q. Lu, X. Wang, J. Cao, C. Chen, K. Chen, Z. Zhao, Z. Niu and J. Chen, *Energy Storage Materials*, 2017, **8**, 77-84.
24. G. Xia, L. Zhang, X. Chen, Y. Huang, D. Sun, F. Fang, Z. Guo and X. Yu, *Energy Storage Materials*, 2018, **14**, 314-323.
25. T. Yang, W. Gao, B. Guo, R. Zhan, Q. Xu, H. He, S.-J. Bao, X. Li, Y. Chen and M. Xu, *Journal of Materials Chemistry A*, 2019, **7**, 150-156.
26. R. Carter, L. Oakes, A. Douglas, N. Muralidharan, A. P. Cohn and C. L. Pint, *Nano letters*, 2017, **17**, 1863-1869.
27. Y.-M. Chen, W. Liang, S. Li, F. Zou, S. M. Bhaway, Z. Qiang, M. Gao, B. D. Vogt and Y. Zhu, *Journal of Materials Chemistry A*, 2016, **4**, 12471-12478.
28. L. Hu, Y. Lu, T. Zhang, T. Huang, Y. Zhu and Y. Qian, *ACS applied materials & interfaces*, 2017, **9**, 13813-13818.
