# Supplementary material for: Normalization of charge/discharge time vs. current rate diagrams for rechargeable batteries
Source: Royal Society of Chemistry journal article supplement (doi:10.1039/d3cp04815b), 2024-01-01
Supplement: d3cp04815b2.xlsx [file d3cp04815b2.xlsx]

## Sheet: Methodology
	This file is the Supporting Information of the paper entitled "Normalization of charge/discharge time vs. current rate diagrams for the rechargeable batteries"
	by Elham Shahpouri [a], Naghmeh Abavi-Torghabeh [a], Mohammad Mahdi Kalantarian* [a], Piercarlo Mustarelli* [b]
	[a]. Department of Ceramic, Materials and Energy Research Center, PO Box 31787-316, Karaj, Iran [b]. Department of Materials Science, University of Milano-Bicocca, and GISEL-INSTM, Viale Cozzi 55, 20125, Milano, Italy
	LiFePO4/C
	A1	Solution combustion synthesis of high-rate performance carbon-coated lithium iron phosphate from inexpensive iron (III) raw material
																									C-rate r
	APR	C-rate	Capacity	th C (mAh/g)	rate	rate^0.5	1/C	C-max	Rr^0.5	Cr	1/Cr	1/Cr^0.5	Crr	t	1/t^0.5	1/r^0.5	CR^0.5	tr	1/tr^0.5	tr max	trr	1/trr^0.5	CRr	CRr^0.5	APR	1/C^0.5	1/Cr^0.5	1/Crr^0.5
	0.827647	0.1	140.7	170	17	4.12311	0.00710732	140.7	4.53212	170	0.00588235	0.0766965	1	8.27647	0.347598	0.220647	0.316228	10	0.316228	10	1	1	0.120824	0.347598	0.827647	0.0843049	0.0766965	1
		1	113.1	170	170	13.0384	0.00884173	140.7	14.3318	136.652	0.00731783	0.0855443	0.803838	0.665294	1.22601	0.0697747	1	0.803838	1.11536	10	0.803838	1.11536	1.20824	1.0992	0.827647	0.0940305	0.0855443	1.11536
		5	93.1	170	850	29.1548	0.0107411	140.7	32.047	112.488	0.00888987	0.0942861	0.661692	0.109529	3.02158	0.0312042	2.23607	0.132338	2.74889	10	0.661692	1.22934	6.04122	2.45789	0.827647	0.103639	0.0942861	1.22934
		10	81.6	170	1700	41.2311	0.0122549	140.7	45.3212	98.5928	0.0101427	0.100711	0.579957	0.048	4.56435	0.0220647	3.16228	0.0579957	4.15243	10	0.579957	1.31311	12.0824	3.47598	0.827647	0.110702	0.100711	1.31311
		20	66	170	3400	58.3095	0.0151515	140.7	64.0939	79.7441	0.0125401	0.111983	0.469083	0.0194118	7.17741	0.0156021	4.47214	0.0234542	6.52965	10	0.469083	1.46007	24.1649	4.91578	0.827647	0.123091	0.111983	1.46007
	A2	Graphene-modified LiFePO4 cathode for lithium ion battery beyond theoretical capacity
	APR	C-rate	CRate	Rate	Capacity	1/C	1/Cr	1/Crr	1/Cr^0.5	Rate^0.5	Rr^0.5	C1*R1^0.5	1/Cr0	1/C0^0.5	1/Cr^0.5	t	1/t^0.5	CR^0.5	tr	1/tr^0.5	tr max	trr	1/trr^0.5	CRr	CRr^0.5	APR	1/C^0.5	1/Cr^0.5	1/Crr^0.5
	1.2	0.1	0.1C	17	204	0.00490196	0.00588235	1	0.0766965	4.12311	3.76386	841.114	3.46021e-05	0.00588235	0.0766965	12	0.288675	0.316228	10	0.316228	10	1	1	0.0833333	0.288675	1.2	0.070014	0.0766965	1
		1.3	1.3C	221	166.4	0.00600962	0.00721154	1.22596	0.0849208	14.8661	13.5708	841.114	4.24208e-05	0.00651313	0.0849208	0.752941	1.15244	1.14018	0.627451	1.26244	10	0.815686	1.10723	1.08333	1.04083	1.2	0.0775217	0.0849208	1.10723
		2.5	2.5C	425	154.2	0.00648508	0.0077821	1.32296	0.0882162	20.6155	18.8193	841.114	4.57771e-05	0.00676588	0.0882162	0.362824	1.66017	1.58114	0.302353	1.81862	10	0.755882	1.1502	2.08333	1.44338	1.2	0.08053	0.0882162	1.1502
		10	10C	1700	123	0.00813008	0.0097561	1.65854	0.098773	41.2311	37.6386	841.114	5.73888e-05	0.00757554	0.098773	0.0723529	3.71768	3.16228	0.0602941	4.07251	10	0.602941	1.28784	8.33333	2.88675	1.2	0.090167	0.098773	1.28784
		28	28C	4760	87	0.0114943	0.0137931	2.34483	0.117444	68.9928	62.9815	841.114	8.11359e-05	0.00900755	0.117444	0.0182773	7.3968	5.2915	0.0152311	8.10279	10	0.426471	1.53128	23.3333	4.83046	1.2	0.107211	0.117444	1.53128
	A3	Graphene-modified LiFePO4 cathode for lithium ion battery beyond theoretical capacity
	APR	C-rate	CRate	Rate	Capacity	1/C	1/Cr	1/Crr	1/Cr^0.5	Rate^0.5	Rr^0.5	C1*R1^0.5	1/Cr0	1/C0^0.5	1/Cr^0.5	t	1/t^0.5	CR^0.5	tr = t*C-rate	1/tr^0.5	tr max	trr = tr/APR	1/trr^0.5	CRr=CR/APR	CRr^0.5	APR	1/C^0.5	1/Cr^0.5	1/Crr^0.5
	0.941765	0.1	0.1C	17	160.1	0.0062461	0.00588235	1	0.0766965	4.12311	4.24867	660.109	3.46021e-05	0.00588235	0.0766965	9.41765	0.325858	0.316228	10	0.316228	10	1	1	0.106184	0.325858	0.941765	0.0790322	0.0766965	1
		1.3	1.3C	221	131.8	0.00758725	0.00714541	1.21472	0.0845305	14.8661	15.3188	660.109	4.20318e-05	0.00648319	0.0845305	0.59638	1.29491	1.14018	0.633258	1.25664	10	0.823235	1.10214	1.38039	1.1749	0.941765	0.0871048	0.0845305	1.10214
		2.5	2.5C	425	120	0.00833333	0.00784804	1.33417	0.0885892	20.6155	21.2434	660.109	4.61649e-05	0.00679448	0.0885892	0.282353	1.88193	1.58114	0.299813	1.82631	10	0.749532	1.15506	2.65459	1.62929	0.941765	0.0912871	0.0885892	1.15506
		10	10C	1700	96.3	0.0103842	0.00977949	1.66251	0.0988913	41.2311	42.4867	660.109	5.75264e-05	0.00758462	0.0988913	0.0566471	4.20157	3.16228	0.0601499	4.07739	10	0.601499	1.28938	10.6184	3.25858	0.941765	0.101903	0.0988913	1.28938
		28	28C	4760	67	0.0149254	0.0140562	2.38955	0.118559	68.9928	71.0939	660.109	8.26835e-05	0.00909305	0.118559	0.0140756	8.42881	5.2915	0.014946	8.1797	10	0.418488	1.54582	29.7314	5.45265	0.941765	0.122169	0.118559	1.54582
	A4	Monodisperse Porous LiFePO4 Microspheres for a High Power Li-Ion Battery Cathode
	APR	C-rate	rate	capacity	I(mah/g)	1/C	I^0.5	1/Cr	Rr^0.5	1/c	Max C	1/Cr0	1/C0^0.5	1/Cr^0.5	rate^0.5	1/Crr	t	1/t^0.5	CR^0.5	tr = t*C-rate	1/tr^0.5	tr max	trr = tr/APR	1/trr^0.5	CRr=CR/APR	CRr^0.5	APR	1/C^0.5	1/Cr^0.5	1/Crr^0.5
	0.198059	0.1	0.1	150	17	0.00666667	4.12311	0.00588235	4.38938	0.00666667	150	3.46021e-05	0.00588235	0.0766965	4.12311	1	8.82353	0.33665	0.316228	10	0.316228	10	1	1	0.113333	0.33665	0.882353	0.0816497	0.0766965	1
		0.2	0.2	144	34	0.00694444	5.83095	0.00612745	6.20752	0.00694444	150	3.60438e-05	0.00600365	0.078278	5.83095	1.04167	4.23529	0.485913	0.447214	4.8	0.456435	10	0.96	1.02062	0.226667	0.476095	0.882353	0.0833333	0.078278	1.02062
		0.5	0.5	136	85	0.00735294	9.21954	0.00648789	9.81495	0.00735294	150	3.81641e-05	0.00617771	0.0805474	9.21954	1.10294	1.6	0.790569	0.707107	1.81333	0.742611	10	0.906667	1.05021	0.566667	0.752773	0.882353	0.0857493	0.0805474	1.05021
		1	1	130	170	0.00769231	13.0384	0.00678733	13.8804	0.00769231	150	3.99255e-05	0.00631866	0.0823853	13.0384	1.15385	0.764706	1.14354	1	0.866667	1.07417	10	0.866667	1.07417	1.13333	1.06458	0.882353	0.0877058	0.0823853	1.07417
		2	2	122	340	0.00819672	18.4391	0.0072324	19.6299	0.00819672	150	4.25435e-05	0.00652254	0.0850435	18.4391	1.22951	0.358824	1.6694	1.41421	0.406667	1.56813	10	0.813333	1.10883	2.26667	1.50555	0.882353	0.0905357	0.0850435	1.10883
		5	5	105	850	0.00952381	29.1548	0.00840336	31.0376	0.00952381	150	4.94315e-05	0.00703076	0.0916698	29.1548	1.42857	0.123529	2.84521	2.23607	0.14	2.67261	10	0.7	1.19523	5.66667	2.38048	0.882353	0.09759	0.0916698	1.19523
		10	10	90.5	1700	0.0110497	41.2311	0.00974976	43.8938	0.0110497	150	5.73515e-05	0.00757308	0.0987409	41.2311	1.65746	0.0532353	4.33411	3.16228	0.0603333	4.07119	10	0.603333	1.28742	11.3333	3.3665	0.882353	0.105118	0.0987409	1.28742
		20	20	55	3400	0.0181818	58.3095	0.0160428	62.0752	0.0181818	150	9.43693e-05	0.00971439	0.12666	58.3095	2.72727	0.0161765	7.86245	4.47214	0.0183333	7.38549	10	0.366667	1.65145	22.6667	4.76095	0.882353	0.13484	0.12666	1.65145
		30	30	33.67	5100	0.0297	71.4143	0.0262059	76.0263	0.0297	150	0.000154152	0.0124158	0.161882	71.4143	4.455	0.00660196	12.3073	5.47723	0.00748222	11.5607	10	0.224467	2.11069	34	5.83095	0.882353	0.172337	0.161882	2.11069
	A5	Electronically conductive phospho-olivines as lithium storage electrodes
	APR	C-rate	I (mAh/g)	capasity	1/Cr	Rr^0.5	I^0.5	1/C	Max C	1/Cr0	1/C0^0.5	1/Cr^0.5	rate^0.5	t	1/t^0.5	1/Crr	CR^0.5	tr = t*C-rate	1/tr^0.5	tr max	trr = tr/APR	1/trr^0.5	CRr=CR/APR	CRr^0.5	APR	1/C^0.5	1/Cr^0.5	1/Crr^0.5
	0.836471	0.0882353	15	142.2	0.00588235	4.23468	3.87298	0.00703235	142.2	3.46021e-05	0.00588235	0.0766965	3.87298	9.48	0.324785	1	0.297044	11.3333	0.297044	11.3333	1	1	0.105485	0.324785	0.836471	0.0838591	0.0766965	1
		0.441176	75	131	0.00638527	9.46903	8.66025	0.00763359	142.2	3.75604e-05	0.00612866	0.0799079	8.66025	1.74667	0.75665	1.0855	0.664211	2.08814	0.692023	11.3333	0.921238	1.04187	0.527426	0.726241	0.836471	0.0873704	0.0799079	1.04187
		0.970588	165	120	0.00697059	14.0448	12.8452	0.00833333	142.2	4.10035e-05	0.00640339	0.08349	12.8452	0.727273	1.1726	1.185	0.985184	0.869454	1.07245	11.3333	0.843882	1.08858	1.16034	1.07719	0.836471	0.0912871	0.08349	1.08858
		1.85294	315	111	0.00753577	19.4057	17.7482	0.00900901	142.2	4.43281e-05	0.00665793	0.0868088	17.7482	0.352381	1.68459	1.28108	1.36123	0.421271	1.5407	11.3333	0.780591	1.13185	2.21519	1.48835	0.836471	0.0949158	0.0868088	1.13185
		3.79412	645	99.8	0.00838147	27.7686	25.3969	0.01002	142.2	4.93028e-05	0.00702159	0.0915504	25.3969	0.154729	2.54223	1.42485	1.94785	0.184978	2.32509	11.3333	0.701828	1.19367	4.53586	2.12976	0.836471	0.1001	0.0915504	1.19367
		9.52941	1620	83	0.010078	44.0081	40.2492	0.0120482	142.2	5.92821e-05	0.00769949	0.100389	40.2492	0.0512346	4.41793	1.71325	3.08697	0.0612509	4.04058	11.3333	0.583685	1.30891	11.3924	3.37526	0.836471	0.109764	0.100389	1.30891
		18.9706	3225	66	0.0126738	62.0926	56.7891	0.0151515	142.2	7.45517e-05	0.00863434	0.112578	56.7891	0.0204651	6.99025	2.15455	4.35552	0.024466	6.3932	11.3333	0.464135	1.46784	22.6793	4.76228	0.836471	0.123091	0.112578	1.46784
	LiFeSO4F
	B1	Improved Cycle Stability and Rate Capability of Graphene Oxide Wrapped Tavorite LiFeSO4F as Cathode Material for Lithium-Ion batteries
	APR	C-rate	Capacity	th C (mAh/g)	rate	rate^0.5	1/C	C-max	Rr^0.5	1/Cr	1/Cr0	1/C0^0.5	1/C^0.5	1/Cr^0.5	1/Crr	t	1/t^0.5	CR^0.5	tr = t*C-rate	1/tr^0.5	tr max	trr = tr/APR	1/trr^0.5	CRr=CR/APR	CRr^0.5	APR	1/C^0.5	1/Cr^0.5	1/Crr^0.5
	0.756291	0.05	114.2	151	7.55	2.74773	0.00875657	114.2	3.15958	0.00662252	4.38577e-05	0.00662252	0.0935765	0.0813788	1	15.1258	0.257123	0.223607	20	0.223607	20	1	1	0.0661121	0.257123	0.756291	0.0935765	0.0813788	1
		0.1	111	151	15.1	3.88587	0.00900901	114.2	4.46832	0.00681344	4.51221e-05	0.0067173	0.0949158	0.0825435	1.02883	7.35099	0.368831	0.316228	9.71979	0.320754	20	0.971979	1.01431	0.132224	0.363626	0.756291	0.0949158	0.0825435	1.01431
		0.2	105	151	30.2	5.49545	0.00952381	114.2	6.31915	0.00720278	4.77005e-05	0.00690655	0.09759	0.0848692	1.08762	3.47682	0.536301	0.447214	4.5972	0.466394	20	0.91944	1.04289	0.264448	0.514245	0.756291	0.09759	0.0848692	1.04289
		0.5	95.1	151	75.5	8.68907	0.0105152	114.2	9.99146	0.00795259	5.26662e-05	0.00725715	0.102544	0.0891773	1.20084	1.2596	0.891011	0.707107	1.6655	0.774868	20	0.83275	1.09583	0.661121	0.813093	0.756291	0.102544	0.0891773	1.09583
		1	85.2	151	151	12.2882	0.0117371	114.2	14.1301	0.00887666	5.87858e-05	0.00766719	0.108338	0.094216	1.34038	0.564238	1.33128	1	0.74606	1.15775	20	0.74606	1.15775	1.32224	1.14989	0.756291	0.108338	0.094216	1.15775
		2	73.3	151	302	17.3781	0.0136426	114.2	19.9829	0.0103178	6.83295e-05	0.00826617	0.116801	0.101576	1.55798	0.242715	2.02979	1.41421	0.320928	1.76521	20	0.641856	1.24819	2.64448	1.62619	0.756291	0.116801	0.101576	1.24819
		5	47.2	151	755	27.4773	0.0211864	114.2	31.5958	0.0160231	0.000106113	0.0103011	0.145556	0.126582	2.41949	0.0625166	3.99947	2.23607	0.082662	3.47814	20	0.41331	1.55547	6.61121	2.57123	0.756291	0.145556	0.126582	1.55547
		10	28	151	1510	38.8587	0.0357143	114.2	44.6832	0.0270104	0.000178877	0.0133745	0.188982	0.164348	4.07857	0.018543	7.34361	3.16228	0.0245184	6.38637	20	0.245184	2.01955	13.2224	3.63626	0.756291	0.188982	0.164348	2.01955
	B2	High electrochemical performance of 3.9V-LiFeSO4F directly synthesized by scalable solid – state reaction within 1h
	APR	C-rate	Capacity	th C (mAh/g)	rate	rate^0.5	1/C	C-max	Rr^0.5	1/Cr	1/Cr0	1/C0^0.5	1/C^0.5	1/Cr^0.5	1/Crr	t	1/t^0.5	CR^0.5	tr = t*C-rate	1/tr^0.5	tr max	trr = tr/APR	1/trr^0.5	CRr=CR/APR	CRr^0.5	APR	1/C^0.5	1/Cr^0.5	1/Crr^0.5
	0.931788	0.05	140.7	151	7.55	2.74773	0.00710732	140.7	2.84652	0.00662252	4.38577e-05	0.00662252	0.0843049	0.0813788	1	18.6358	0.231647	0.223607	20	0.223607	20	1	1	0.0536603	0.231647	0.931788	0.0843049	0.0813788	1
		1	111	151	151	12.2882	0.00900901	140.7	12.73	0.00839449	5.55926e-05	0.00745605	0.0949158	0.0916214	1.26757	0.735099	1.16634	1	0.788913	1.12586	20	0.788913	1.12586	1.07321	1.03596	0.931788	0.0949158	0.0916214	1.12586
		2	90.2	151	302	17.3781	0.0110865	140.7	18.003	0.0103302	6.84122e-05	0.00827117	0.105292	0.101638	1.55987	0.298675	1.82979	1.41421	0.32054	1.76628	20	0.64108	1.24895	2.14641	1.46506	0.931788	0.105292	0.101638	1.24895
		5	70	151	755	27.4773	0.0142857	140.7	28.4652	0.0133113	8.8154e-05	0.00938904	0.119523	0.115374	2.01	0.0927152	3.28416	2.23607	0.0995025	3.17017	20	0.497512	1.41774	5.36603	2.31647	0.931788	0.119523	0.115374	1.41774
		10	59	151	1510	38.8587	0.0169492	140.7	40.2559	0.015793	0.00010459	0.0102269	0.130189	0.12567	2.38475	0.0390728	5.05897	3.16228	0.0419332	4.88339	20	0.419332	1.54426	10.7321	3.27598	0.931788	0.130189	0.12567	1.54426
	B3	Facile topotactic synthesis of tavorite LiFeSO4F using supercritical methanol
	APR	C-rate	Capacity	th C (mAh/g)	rate	rate^0.5	1/C	C-max	Rr^0.5	1/Cr	1/Cr0	1/C0^0.5	1/C^0.5	1/Cr^0.5	1/Crr	t	1/t^0.5	CR^0.5	tr = t*C-rate	1/tr^0.5	tr max	trr = tr/APR	1/trr^0.5	CRr=CR/APR	CRr^0.5	APR	1/C^0.5	1/Cr^0.5	1/Crr^0.5
	0.83245	0.05	125.7	151	7.55	2.74773	0.00795545	125.7	3.01158	0.00662252	4.38577e-05	0.00662252	0.0891933	0.0813788	1	16.649	0.245079	0.223607	20	0.223607	20	1	1	0.0600636	0.245079	0.83245	0.0891933	0.0813788	1
		0.2	116.6	151	30.2	5.49545	0.00857633	125.7	6.02316	0.00713937	4.72806e-05	0.00687609	0.0926085	0.0844948	1.07804	3.86093	0.508925	0.447214	4.63803	0.464337	20	0.927605	1.03829	0.240255	0.490158	0.83245	0.0926085	0.0844948	1.03829
		0.5	99.9	151	75.5	8.68907	0.01001	125.7	9.52345	0.00833284	5.51843e-05	0.00742862	0.10005	0.0912844	1.25826	1.32318	0.869342	0.707107	1.5895	0.793177	20	0.794749	1.12172	0.600636	0.775007	0.83245	0.10005	0.0912844	1.12172
		1	88.1	151	151	12.2882	0.0113507	125.7	13.4682	0.00944893	6.25757e-05	0.00791048	0.10654	0.0972056	1.42679	0.583444	1.30918	1	0.700875	1.19448	20	0.700875	1.19448	1.20127	1.09603	0.83245	0.10654	0.0972056	1.19448
		2	72	151	302	17.3781	0.0138889	125.7	19.0469	0.0115618	7.65683e-05	0.00875033	0.117851	0.107526	1.74583	0.238411	2.04803	1.41421	0.286396	1.8686	20	0.572792	1.3213	2.40255	1.55001	0.83245	0.117851	0.107526	1.3213
		5	47	151	755	27.4773	0.0212766	125.7	30.1158	0.0177117	0.000117296	0.0108303	0.145865	0.133085	2.67447	0.0622517	4.00797	2.23607	0.0747812	3.65682	20	0.373906	1.63538	6.00636	2.45079	0.83245	0.145865	0.133085	1.63538
	B4	Intrinsic Nanodomains in Triplite LiFeSO4F and Its Implication in Lithium-Ion Diffusion
	APR	C-rate	Capacity	th C (mAh/g)	rate	rate^0.5	1/C	C-max	Rr^0.5	1/Cr	1/Cr0	1/C0^0.5	1/C^0.5	1/Cr^0.5	1/Crr	t	1/t^0.5	CR^0.5	tr = t*C-rate	1/tr^0.5	tr max	trr = tr/APR	1/trr^0.5	CRr=CR/APR	CRr^0.5	APR	1/C^0.5	1/Cr^0.5	1/Crr^0.5
	0.80596	0.05	121.7	151	7.55	2.74773	0.00821693	121.7	3.06067	0.00662252	4.38577e-05	0.00662252	0.0906473	0.0813788	1	16.1192	0.249074	0.223607	20	0.223607	20	1	1	0.0620378	0.249074	0.80596	0.0906473	0.0813788	1
		0.1	114.5	151	15.1	3.88587	0.00873362	121.7	4.32844	0.00703895	4.66156e-05	0.00682756	0.0934539	0.0838985	1.06288	7.58278	0.36315	0.316228	9.40838	0.326019	20	0.940838	1.03096	0.124076	0.352244	0.80596	0.0934539	0.0838985	1.03096
		0.2	103.3	151	30.2	5.49545	0.00968054	121.7	6.12134	0.00780213	5.16698e-05	0.00718817	0.0983897	0.0883297	1.17812	3.42053	0.540696	0.447214	4.24404	0.485412	20	0.848809	1.08541	0.248151	0.498148	0.80596	0.0983897	0.0883297	1.08541
		0.5	94.8	151	75.5	8.68907	0.0105485	121.7	9.67869	0.00850169	5.63026e-05	0.0075035	0.102706	0.0922046	1.28376	1.25563	0.89242	0.707107	1.55793	0.801173	20	0.778965	1.13303	0.620378	0.787641	0.80596	0.102706	0.0922046	1.13303
		1	84.5	151	151	12.2882	0.0118343	121.7	13.6877	0.00953799	6.31655e-05	0.00794767	0.108786	0.0976626	1.44024	0.559603	1.33678	1	0.69433	1.2001	20	0.69433	1.2001	1.24076	1.11389	0.80596	0.108786	0.0976626	1.2001
		2	72.9	151	302	17.3781	0.0137174	121.7	19.3574	0.0110557	7.32165e-05	0.00855667	0.117121	0.105146	1.66941	0.241391	2.03535	1.41421	0.299507	1.82724	20	0.599014	1.29206	2.48151	1.57528	0.80596	0.117121	0.105146	1.29206
		3	65.1	151	453	21.2838	0.015361	121.7	23.7079	0.0123803	8.1989e-05	0.00905478	0.123939	0.111267	1.86943	0.143709	2.6379	1.73205	0.178307	2.36818	20	0.534922	1.36727	3.72227	1.92932	0.80596	0.123939	0.111267	1.36727
		4	61	151	604	24.5764	0.0163934	121.7	27.3755	0.0132125	8.74998e-05	0.00935413	0.128037	0.114945	1.99508	0.100993	3.14669	2	0.125308	2.82495	20	0.501233	1.41247	4.96302	2.22778	0.80596	0.128037	0.114945	1.41247
		5	56.9	151	755	27.4773	0.0175747	121.7	30.6067	0.0141645	9.38047e-05	0.00968528	0.13257	0.119015	2.13884	0.0753642	3.64265	2.23607	0.0935086	3.2702	20	0.467543	1.46248	6.20378	2.49074	0.80596	0.13257	0.119015	1.46248
	B5	Understanding and Controlling the Surface Chemistry of LiFeSO4F for an Enhanced Cathode Functionality
	APR	C-rate	Capacity	th C (mAh/g)	rate	rate^0.5	1/C	C-max	Rr^0.5	1/Cr	1/Cr0	1/C0^0.5	1/C^0.5	1/Cr^0.5	1/Crr	t	1/t^0.5	CR^0.5	tr = t*C-rate	1/tr^0.5	tr max	trr = tr/APR	1/trr^0.5	CRr=CR/APR	CRr^0.5	APR	1/C^0.5	1/Cr^0.5	1/Crr^0.5
	0.796026	0.05	120.2	151	7.55	2.74773	0.00831947	120.2	3.07971	0.00662252	4.38577e-05	0.00662252	0.0912111	0.0813788	1	15.9205	0.250623	0.223607	20	0.223607	20	1	1	0.062812	0.250623	0.796026	0.0912111	0.0813788	1
		0.1	111.6	151	15.1	3.88587	0.00896057	120.2	4.35537	0.00713285	4.72374e-05	0.00687295	0.0946603	0.0844562	1.07706	7.39073	0.367838	0.316228	9.28453	0.328186	20	0.928453	1.03782	0.125624	0.354435	0.796026	0.0946603	0.0844562	1.03782
		0.2	107.6	151	30.2	5.49545	0.00929368	120.2	6.15942	0.00739802	4.89935e-05	0.00699953	0.0964037	0.0860117	1.1171	3.56291	0.529782	0.447214	4.47587	0.472673	20	0.895175	1.05693	0.251248	0.501246	0.796026	0.0964037	0.0860117	1.05693
		0.5	99.2	151	75.5	8.68907	0.0100806	120.2	9.7389	0.00802446	5.31421e-05	0.00728986	0.100402	0.0895794	1.21169	1.31391	0.872404	0.707107	1.65058	0.778362	20	0.825291	1.10077	0.62812	0.79254	0.796026	0.100402	0.0895794	1.10077
		1	88	151	151	12.2882	0.0113636	120.2	13.7729	0.00904576	5.99057e-05	0.00773988	0.1066	0.0951092	1.36591	0.582781	1.30993	1	0.732113	1.16872	20	0.732113	1.16872	1.25624	1.12082	0.796026	0.1066	0.0951092	1.16872
		2	54.4	151	302	17.3781	0.0183824	120.2	19.4778	0.0146328	9.69062e-05	0.0098441	0.135582	0.120966	2.20956	0.180132	2.35616	1.41421	0.22629	2.10217	20	0.452579	1.48646	2.51248	1.58508	0.796026	0.135582	0.120966	1.48646
	B6	Identifying the electrochemical processes in LiFeSO4F cathodes for Li-ion batteries
	APR	C-rate	Capacity	th C (mAh/g)	rate	rate^0.5	1/C	C-max	Rr^0.5	1/Cr	1/Cr0	1/C0^0.5	1/C^0.5	1/Cr^0.5	1/Crr	t	1/t^0.5	CR^0.5	tr = t*C-rate	1/tr^0.5	tr max	trr = tr/APR	1/trr^0.5	CRr=CR/APR	CRr^0.5	APR	1/C^0.5	1/Cr^0.5	1/Crr^0.5
	0.611258	0.05	92.3	151	7.55	2.74773	0.0108342	92.3	3.51448	0.00662252	4.38577e-05	0.00662252	0.104088	0.0813788	1	12.2252	0.286004	0.223607	20	0.223607	20	1	1	0.0817985	0.286004	0.611258	0.104088	0.0813788	1
		0.1	88.5	151	15.1	3.88587	0.0112994	92.3	4.97023	0.00690687	4.57409e-05	0.0067632	0.106299	0.0831076	1.04294	5.86093	0.413064	0.316228	9.5883	0.322945	20	0.95883	1.02124	0.163597	0.404471	0.611258	0.106299	0.0831076	1.02124
		0.2	84.1	151	30.2	5.49545	0.0118906	92.3	7.02896	0.00726823	4.8134e-05	0.00693787	0.109044	0.0852539	1.0975	2.78477	0.599246	0.447214	4.5558	0.468509	20	0.911159	1.04762	0.327194	0.572009	0.611258	0.109044	0.0852539	1.04762
		0.5	76.1	151	75.5	8.68907	0.0131406	92.3	11.1138	0.0080323	5.31941e-05	0.00729343	0.114632	0.0896231	1.21288	1.00795	0.99605	0.707107	1.64897	0.778742	20	0.824485	1.10131	0.817985	0.904425	0.611258	0.114632	0.0896231	1.10131
		1	68.6	151	151	12.2882	0.0145773	92.3	15.7172	0.00891047	5.90097e-05	0.00768178	0.120736	0.0943953	1.34548	0.454305	1.48363	1	0.743229	1.15995	20	0.743229	1.15995	1.63597	1.27905	0.611258	0.120736	0.0943953	1.15995
		2	53.9	151	302	17.3781	0.0185529	92.3	22.2275	0.0113406	7.51033e-05	0.00866622	0.136209	0.106492	1.71243	0.178477	2.36706	1.41421	0.291983	1.85064	20	0.583965	1.3086	3.27194	1.80885	0.611258	0.136209	0.106492	1.3086
		5	23.7	151	755	27.4773	0.0421941	92.3	35.1448	0.0257915	0.000170805	0.0130692	0.205412	0.160597	3.89451	0.0313907	5.64416	2.23607	0.0513543	4.41277	20	0.256771	1.97345	8.17985	2.86004	0.611258	0.205412	0.160597	1.97345
		10	3.2	151	1510	38.8587	0.3125	92.3	49.7023	0.191018	0.00126502	0.0355671	0.559017	0.437056	28.8437	0.00211921	21.7227	3.16228	0.00346696	16.9834	20	0.0346696	5.37064	16.3597	4.04471	0.611258	0.559017	0.437056	5.37064
	B7	Synthesis, characterization, and electrochemical properties of lithium-based fluorosulfate nanoparticles as cathode for lithium-ion batteries
	APR	C-rate	Capacity	th C (mAh/g)	rate	rate^0.5	1/C	C-max	Rr^0.5	1/Cr	1/Cr0	1/C0^0.5	1/C^0.5	1/Cr^0.5	1/Crr	t	1/t^0.5	CR^0.5	tr = t*C-rate	1/tr^0.5	tr max	trr = tr/APR	1/trr^0.5	CRr=CR/APR	CRr^0.5	APR	1/C^0.5	1/Cr^0.5	1/Crr^0.5
	0.762252	0.05	115.1	151	7.55	2.74773	0.0086881	115.1	3.1472	0.00662252	4.38577e-05	0.00662252	0.09321	0.0813788	1	15.245	0.256115	0.223607	20	0.223607	20	1	1	0.0655951	0.256115	0.762252	0.09321	0.0813788	1
		0.2	93	151	30.2	5.49545	0.0107527	115.1	6.2944	0.00819625	5.42798e-05	0.00736748	0.103695	0.0905332	1.23763	3.07947	0.569852	0.447214	4.03997	0.497521	20	0.807993	1.11249	0.262381	0.512231	0.762252	0.103695	0.0905332	1.11249
		1	76.9	151	151	12.2882	0.0130039	115.1	14.0747	0.00991225	6.5644e-05	0.0081021	0.114035	0.0995603	1.49675	0.509272	1.40128	1	0.668115	1.22342	20	0.668115	1.22342	1.3119	1.14538	0.762252	0.114035	0.0995603	1.22342
		2	65	151	302	17.3781	0.0153846	115.1	19.9046	0.0117269	7.76619e-05	0.0088126	0.124035	0.108291	1.77077	0.215232	2.15549	1.41421	0.282363	1.8819	20	0.564726	1.3307	2.62381	1.61982	0.762252	0.124035	0.108291	1.3307
	Na-ion
	C1	Novel Cathode Materials for Na-Ion Batteries Composed of Spoke-Like Nanorods of Na[Ni0.61Co0.12Mn0.27]O2 Assembled in Spherical Secondary Particles
	APR	C-rate	Capacity	th C (mAh/g)	rate	rate^0.5	1/C	C-max	Rr^0.5	1/Cr	1/Cr0	1/C0^0.5	1/C^0.5	1/Cr^0.5	1/Crr	t	1/t^0.5	CR^0.5	tr = t*C-rate	1/tr^0.5	tr max	trr = tr/APR	1/trr^0.5	CRr=CR/APR	CRr^0.5	APR	1/C^0.5	1/Cr^0.5	1/Crr^0.5
	0.671573	0.1	159.7	237.8	23.78	4.87647	0.00626174	159.7	5.95058	0.00420521	1.76838e-05	0.00420521	0.0791312	0.0648476	1	6.71573	0.385881	0.316228	10	0.316228	10	1	1	0.148904	0.385881	0.671573	0.0791312	0.0648476	1
		0.2	155.5	237.8	47.56	6.89638	0.00643087	159.7	8.41539	0.0043188	1.81615e-05	0.00426163	0.0801927	0.0657175	1.02701	3.26955	0.553039	0.447214	4.8685	0.453213	10	0.973701	1.01341	0.297808	0.545718	0.671573	0.0801927	0.0657175	1.01341
		0.5	149.7	237.8	118.9	10.9041	0.00668003	159.7	13.3059	0.00448612	1.88651e-05	0.0043434	0.0817314	0.0669785	1.0668	1.25904	0.89121	0.707107	1.87477	0.730342	10	0.937383	1.03286	0.744521	0.862856	0.671573	0.0817314	0.0669785	1.03286
		1	144.4	237.8	237.8	15.4208	0.00692521	159.7	18.8174	0.00465078	1.95575e-05	0.00442239	0.0832178	0.0681966	1.10596	0.607233	1.28328	1	0.904195	1.05164	10	0.904195	1.05164	1.48904	1.22026	0.671573	0.0832178	0.0681966	1.05164
		3	137	237.8	713.4	26.7095	0.00729927	159.7	32.5927	0.00490199	2.06139e-05	0.00454026	0.0854358	0.0700142	1.16569	0.192038	2.28195	1.73205	0.285953	1.87005	10	0.857858	1.07967	4.46713	2.11356	0.671573	0.0854358	0.0700142	1.07967
		5	133.3	237.8	1189	34.4819	0.00750188	159.7	42.077	0.00503806	2.11861e-05	0.00460284	0.0866134	0.0709793	1.19805	0.112111	2.98659	2.23607	0.166938	2.4475	10	0.83469	1.09455	7.44521	2.72859	0.671573	0.0866134	0.0709793	1.09455
		10	123	237.8	2378	48.7647	0.00813008	159.7	59.5058	0.00545994	2.29602e-05	0.00479168	0.090167	0.0738914	1.29837	0.0517241	4.39697	3.16228	0.0770194	3.6033	10	0.770194	1.13946	14.8904	3.85881	0.671573	0.090167	0.0738914	1.13946
	C2	High-performance Ti-doped O3-type Na[Tix(Ni0.6Co0.2Mn0.2)1-x]O2 cathodes for practical sodium-ion batteries
	APR	C-rate	Capacity	th C (mAh/g)	rate	rate^0.5	1/C	C-max	Rr^0.5	1/Cr	1/Cr0	1/C0^0.5	1/C^0.5	1/Cr^0.5	1/Crr	t	1/t^0.5	CR^0.5	tr = t*C-rate	1/tr^0.5	tr max	trr = tr/APR	1/trr^0.5	CRr=CR/APR	CRr^0.5	APR	1/C^0.5	1/Cr^0.5	1/Crr^0.5
	0.653879	0.1	155.1	237.2	23.72	4.87032	0.00644745	155.1	6.02294	0.00421585	1.77734e-05	0.00421585	0.080296	0.0649296	1	6.53879	0.391067	0.316228	10	0.316228	10	1	1	0.152934	0.391067	0.653879	0.080296	0.0649296	1
		0.5	150.3	237.2	118.6	10.8904	0.00665336	155.1	13.4677	0.00435049	1.8341e-05	0.00428264	0.0815681	0.0659582	1.03194	1.26728	0.888307	0.707107	1.9381	0.718309	10	0.969052	1.01584	0.764668	0.874453	0.653879	0.0815681	0.0659582	1.01584
		1	143.4	237.2	237.2	15.4013	0.0069735	155.1	19.0462	0.00455982	1.92235e-05	0.00438447	0.0835075	0.0675265	1.08159	0.604553	1.28612	1	0.924565	1.04	10	0.924565	1.04	1.52934	1.23666	0.653879	0.0835075	0.0675265	1.04
		3	136.3	237.2	711.6	26.6758	0.00733676	155.1	32.989	0.00479735	2.02249e-05	0.00449721	0.0856549	0.0692629	1.13793	0.19154	2.28491	1.73205	0.292929	1.84765	10	0.878788	1.06674	4.58801	2.14196	0.653879	0.0856549	0.0692629	1.06674
		5	125.1	237.2	1186	34.4384	0.00799361	155.1	42.5886	0.00522685	2.20356e-05	0.00469421	0.089407	0.0722969	1.23981	0.105481	3.07903	2.23607	0.161315	2.48979	10	0.806576	1.11347	7.64668	2.76526	0.653879	0.089407	0.0722969	1.11347
		7	116.8	237.2	1660.4	40.748	0.00856164	155.1	50.3916	0.00559828	2.36015e-05	0.00485814	0.0925292	0.0748216	1.32791	0.0703445	3.77038	2.64575	0.10758	3.04883	10	0.753063	1.15235	10.7054	3.2719	0.653879	0.0925292	0.0748216	1.15235
		10	112.3	237.2	2372	48.7032	0.00890472	155.1	60.2294	0.00582261	2.45472e-05	0.00495452	0.0943648	0.076306	1.38112	0.047344	4.59587	3.16228	0.0724049	3.71634	10	0.724049	1.17521	15.2934	3.91067	0.653879	0.0943648	0.076306	1.17521
	C3	Quaternary Transition Metal Oxide Layered Framework O3-type Na[Ni0.32Fe0.13Co0.15Mn0.40]O2 Cathode Material for High-Performance Sodium-Ion Batteries
	APR	C-rate	Capacity	th C (mAh/g)	rate	rate^0.5	1/C	C-max	Rr^0.5	1/Cr	1/Cr0	1/C0^0.5	1/C^0.5	1/Cr^0.5	1/Crr	t	1/t^0.5	CR^0.5	tr = t*C-rate	1/tr^0.5	tr max	trr = tr/APR	1/trr^0.5	CRr=CR/APR	CRr^0.5	APR	1/C^0.5	1/Cr^0.5	1/Crr^0.5
	0.739983	0.1	177.3	239.6	23.96	4.8949	0.00564016	177.3	5.69026	0.00417362	1.74191e-05	0.00417362	0.075101	0.0646036	1	7.39983	0.367611	0.316228	10	0.316228	10	1	1	0.135138	0.367611	0.739983	0.075101	0.0646036	1
		0.2	172.7	239.6	47.92	6.92243	0.00579039	177.3	8.04725	0.00428479	1.78831e-05	0.00422884	0.0760946	0.0654583	1.02664	3.60392	0.526759	0.447214	4.87028	0.45313	10	0.974055	1.01323	0.270276	0.519881	0.739983	0.0760946	0.0654583	1.01323
		0.5	166.8	239.6	119.8	10.9453	0.0059952	177.3	12.7238	0.00443635	1.85157e-05	0.00430298	0.0774287	0.0666059	1.06295	1.39232	0.847482	0.707107	1.88156	0.729023	10	0.940778	1.03099	0.675691	0.822004	0.739983	0.0774287	0.0666059	1.03099
		1	160	239.6	239.6	15.479	0.00625	177.3	17.9942	0.0046249	1.93026e-05	0.00439347	0.0790569	0.0680066	1.10813	0.66778	1.22372	1	0.902425	1.05268	10	0.902425	1.05268	1.35138	1.16249	0.739983	0.0790569	0.0680066	1.05268
		2	152.3	239.6	479.2	21.8906	0.00656599	177.3	25.4476	0.00485872	2.02785e-05	0.00450316	0.0810308	0.0697045	1.16415	0.317821	1.77382	1.41421	0.429498	1.52588	10	0.858996	1.07896	2.70276	1.64401	0.739983	0.0810308	0.0697045	1.07896
		3	147.3	239.6	718.8	26.8104	0.00678887	177.3	31.1669	0.00502365	2.09668e-05	0.00457895	0.0823946	0.0708777	1.20367	0.204925	2.20904	1.73205	0.276932	1.90026	10	0.830795	1.09712	4.05415	2.01349	0.739983	0.0823946	0.0708777	1.09712
		5	137.7	239.6	1198	34.6121	0.00726216	177.3	40.2362	0.00537388	2.24285e-05	0.00473588	0.0852183	0.0733068	1.28758	0.114942	2.94959	2.23607	0.15533	2.5373	10	0.77665	1.13472	6.75691	2.59941	0.739983	0.0852183	0.0733068	1.13472
	C4	Durable high-rate capability Na0.44MnO2 cathode material for sodium-ion batteries
	APR	C-rate	Capacity	th C (mAh/g)	rate	rate^0.5	1/C	C-max	Rr^0.5	1/Cr	1/Cr0	1/C0^0.5	1/C^0.5	1/Cr^0.5	1/Crr	t	1/t^0.5	CR^0.5	tr = t*C-rate	1/tr^0.5	tr max	trr = tr/APR	1/trr^0.5	CRr=CR/APR	CRr^0.5	APR	1/C^0.5	1/Cr^0.5	1/Crr^0.5
	0.922634	0.1	112.1	121.5	12.15	3.48569	0.00892061	112.1	3.62889	0.00823045	6.77404e-05	0.00823045	0.094449	0.0907218	1	9.22634	0.329219	0.316228	10	0.316228	10	1	1	0.108385	0.329219	0.922634	0.094449	0.0907218	1
		0.2	110.4	121.5	24.3	4.9295	0.00905797	112.1	5.13202	0.00835719	6.87835e-05	0.00829358	0.0951734	0.0914177	1.0154	4.54321	0.469157	0.447214	4.92417	0.450644	10	0.984835	1.00767	0.216771	0.465586	0.922634	0.0951734	0.0914177	1.00767
		0.5	108.6	121.5	60.75	7.79423	0.0092081	112.1	8.11444	0.00849571	6.99235e-05	0.00836203	0.0959589	0.0921722	1.03223	1.78765	0.747925	0.707107	1.93756	0.718411	10	0.968778	1.01599	0.541927	0.736157	0.922634	0.0959589	0.0921722	1.01599
		1	107.2	121.5	121.5	11.0227	0.00932836	112.1	11.4755	0.00860666	7.08367e-05	0.00841645	0.0965834	0.0927721	1.04571	0.882305	1.06461	1	0.956289	1.0226	10	0.956289	1.0226	1.08385	1.04108	0.922634	0.0965834	0.0927721	1.0226
		2	105.1	121.5	243	15.5885	0.00951475	112.1	16.2289	0.00877863	7.22521e-05	0.00850012	0.0975436	0.0936943	1.0666	0.43251	1.52055	1.41421	0.468778	1.46055	10	0.937556	1.03276	2.16771	1.47231	0.922634	0.0975436	0.0936943	1.03276
		5	99	121.5	607.5	24.6475	0.010101	112.1	25.6601	0.00931953	7.6704e-05	0.00875808	0.100504	0.0965377	1.13232	0.162963	2.47717	2.23607	0.176628	2.37942	10	0.88314	1.06411	5.41927	2.32793	0.922634	0.100504	0.0965377	1.06411
		10	92	121.5	1215	34.8569	0.0108696	112.1	36.2889	0.0100286	8.25401e-05	0.00908516	0.104257	0.100143	1.21848	0.0757202	3.63408	3.16228	0.0820696	3.49067	10	0.820696	1.10385	10.8385	3.29219	0.922634	0.104257	0.100143	1.10385
	C5	Controlled synthesis of Na0.44MnO2 cathode material for sodium ion batteries with superior performance through urea-based solution combustion synthesis
	APR	C-rate	Capacity	th C (mAh/g)	rate	rate^0.5	1/C	C-max	Rr^0.5	1/Cr	1/Cr0	1/C0^0.5	1/C^0.5	1/Cr^0.5	1/Crr	t	1/t^0.5	CR^0.5	tr = t*C-rate	1/tr^0.5	tr max	trr = tr/APR	1/trr^0.5	CRr=CR/APR	CRr^0.5	APR	1/C^0.5	1/Cr^0.5	1/Crr^0.5
	0.973663	0.1	118.3	121.5	12.15	3.48569	0.00845309	118.3	3.53251	0.00823045	6.77404e-05	0.00823045	0.0919407	0.0907218	1	9.73663	0.320476	0.316228	10	0.316228	10	1	1	0.102705	0.320476	0.973663	0.0919407	0.0907218	1
		0.2	116.4	121.5	24.3	4.9295	0.00859107	118.3	4.99573	0.0083648	6.88461e-05	0.00829735	0.092688	0.0914593	1.01632	4.79012	0.456906	0.447214	4.9197	0.450849	10	0.983939	1.00813	0.20541	0.453222	0.973663	0.092688	0.0914593	1.00813
		0.4	114.4	121.5	48.6	6.97137	0.00874126	118.3	7.06503	0.00851104	7.00497e-05	0.00836957	0.0934947	0.0922553	1.03409	2.35391	0.651786	0.632456	2.41758	0.643146	10	0.967033	1.0169	0.41082	0.640952	0.973663	0.0934947	0.0922553	1.0169
		0.7	112.5	121.5	85.05	9.22226	0.00888889	118.3	9.34615	0.00865478	7.12327e-05	0.00843995	0.0942809	0.0930311	1.05156	1.32275	0.869483	0.83666	1.35853	0.857956	10	0.950972	1.02545	0.718935	0.8479	0.973663	0.0942809	0.0930311	1.02545
		1	111	121.5	121.5	11.0227	0.00900901	118.3	11.1708	1.06577	0.00877173	0.0936575	0.0949158	1.03236	1.06577	0.91358	1.04623	1	0.938292	1.03236	10	0.938292	1.03236	1.02705	1.01343	0.973663	0.0949158	1.03236	1.03236
	C6	Na4Mn9O18 as a positive electrode material for an aqueous electrolyte sodium-ion energy storage device
APR		C-rate	Rate	Capacity	1/C	Rate^0.5	1/Cr	Rr^0.5	1/Cr0	1/C0^0.5	1/C^0.5	1/Cr^0.5	1/Crr	t	1/t^0.5	C max	C th	CR^0.5	tr = t*C-rate	1/tr^0.5	tr max	trr = tr/APR	1/trr^0.5	CRr=CR/APR	CRr^0.5	APR	1/C^0.5	1/Cr^0.5	1/Crr^0.5
0.285124	24.2	0.2	24.2	34.5	0.0289855	4.91935	0.00826446	9.21278	6.80203e-05	0.00824744	0.170251	0.0909091	1	1.42562	0.837526	34.5	121	0.447214	5	0.447214	5	1	1	0.701449	0.837526	0.285124	0.170251	0.0909091	1
		1.2	145.2	30.5	0.0327869	12.0499	0.00934833	22.5666	7.6941e-05	0.0087716	0.181071	0.0966867	1.13115	0.210055	2.18189	34.5	121	1.09545	0.736715	1.16507	5	0.884058	1.06355	4.2087	2.05151	0.285124	0.181071	0.0966867	1.06355
		2.3	278.3	28.5	0.0350877	16.6823	0.0100043	31.2421	8.23403e-05	0.00907416	0.187317	0.100022	1.21053	0.102407	3.12489	34.5	121	1.51658	0.359168	1.6686	5	0.826087	1.10024	8.06667	2.84019	0.285124	0.187317	0.100022	1.10024
		5.8	701.8	25.5	0.0392157	26.4915	0.0111813	49.6124	9.20274e-05	0.00959309	0.19803	0.105742	1.35294	0.0363351	5.2461	34.5	121	2.40832	0.127436	2.80126	5	0.73913	1.16316	20.342	4.51021	0.285124	0.19803	0.105742	1.16316
		11.6	1403.6	22.5	0.0444444	37.4647	0.0126722	70.1625	0.000104298	0.0102126	0.210819	0.112571	1.53333	0.0160302	7.89824	34.5	121	3.40588	0.0562219	4.21742	5	0.652174	1.23828	40.6841	6.37841	0.285124	0.210819	0.112571	1.23828
		18	2178	20	0.05	46.669	0.0142562	87.4001	0.000117335	0.0108321	0.223607	0.119399	1.725	0.00918274	10.4355	34.5	121	4.24264	0.0322061	5.57225	5	0.57971	1.31339	63.1304	7.94547	0.285124	0.223607	0.119399	1.31339
	Na3V2(PO4)3
	D2	Layer-by-Layer Na3V2(PO4)3 Embedded in Reduced Graphene Oxide as Superior Rate and Ultralong-Life Sodium-Ion Battery Cathode
	APR	C-rate	Capacity	th C (mAh/g)	rate	rate^0.5	1/C	C-max	Rr^0.5	1/Cr	1/Cr0	1/C0^0.5	1/C^0.5	1/Cr^0.5	1/Crr	t	1/t^0.5	CR^0.5	tr = t*C-rate	1/tr^0.5	tr max	trr = tr/APR	1/trr^0.5	CRr=CR/APR	CRr^0.5	APR	1/C^0.5	1/Cr^0.5	1/Crr^0.5
	0.979592	0.5	115.2	117.6	58.8	7.66812	0.00868056	117.1	7.68447	0.00864365	7.35004e-05	0.00857324	0.0931695	0.0929712	1.01649	1.95918	0.714435	0.707107	1.96755	0.712914	1.96755	0.983775	1.00821	0.502135	0.708615	0.995748	0.0931695	0.0929712	1.00821
		1	117.1	117.6	117.6	10.8444	0.00853971	117.1	10.8675	0.0085034	7.23078e-05	0.0085034	0.0924105	0.0922139	1	0.995748	1.00213	1	1	1	1.96755	1	1	1.00427	1.00213	0.995748	0.0924105	0.0922139	1
		2	114.8	117.6	235.2	15.3362	0.0087108	117.1	15.3689	0.00867377	7.37565e-05	0.00858816	0.0933317	0.0931331	1.02003	0.488095	1.43136	1.41421	0.490179	1.42831	1.96755	0.980359	1.00997	2.00854	1.41723	0.995748	0.0933317	0.0931331	1.00997
		5	111.7	117.6	588	24.2487	0.00895255	117.1	24.3004	0.00891449	7.58035e-05	0.00870652	0.0946179	0.0944166	1.04834	0.189966	2.29436	2.23607	0.190777	2.28948	1.96755	0.953886	1.02389	5.02135	2.24084	0.995748	0.0946179	0.0944166	1.02389
		10	107.3	117.6	1176	34.2929	0.00931966	117.1	34.366	0.00928004	7.89119e-05	0.00888324	0.0965384	0.096333	1.09133	0.0912415	3.31058	3.16228	0.0916311	3.30353	1.96755	0.916311	1.04467	10.0427	3.16902	0.995748	0.0965384	0.096333	1.04467
		20	100.6	117.6	2352	48.4974	0.00994036	117.1	48.6009	0.00989809	8.41675e-05	0.00917428	0.0997013	0.0994892	1.16402	0.0427721	4.83526	4.47214	0.0429547	4.82497	1.96755	0.859095	1.0789	20.0854	4.48167	0.995748	0.0997013	0.0994892	1.0789
		50	88.3	117.6	5880	76.6812	0.011325	117.1	76.8447	0.0112769	9.58918e-05	0.00979244	0.106419	0.106193	1.32616	0.015017	8.16034	7.07107	0.0150811	8.14297	1.96755	0.754056	1.15159	50.2135	7.08615	0.995748	0.106419	0.106193	1.15159
		100	84.2	117.6	11760	108.444	0.0118765	117.1	108.675	0.011826	0.000100561	0.010028	0.108979	0.108747	1.39074	0.00715986	11.8181	10	0.00719044	11.7929	1.96755	0.719044	1.17929	100.427	10.0213	0.995748	0.108979	0.108747	1.17929
		200	69.7	117.6	23520	153.362	0.0143472	117.1	153.689	0.0142862	0.000121481	0.0110219	0.11978	0.119525	1.68006	0.00296344	18.3697	14.1421	0.00297609	18.3306	1.96755	0.595218	1.29617	200.854	14.1723	0.995748	0.11978	0.119525	1.29617
	D3	Nanoconfined Carbon-Coated Na 3 V 2 (PO 4 ) 3 Particles in Mesoporous Carbon Enabling Ultralong Cycle Life for Sodium-Ion Batteries
	APR	C-rate	Capacity	th C (mAh/g)	rate	rate^0.5	1/C	C-max	Rr^0.5	1/Cr	1/Cr0	1/C0^0.5	1/C^0.5	1/Cr^0.5	1/Crr	t	1/t^0.5	CR^0.5	tr = t*C-rate	1/tr^0.5	tr max	trr = tr/APR	1/trr^0.5	CRr=CR/APR	CRr^0.5	APR	1/C^0.5	1/Cr^0.5	1/Crr^0.5
	0.977891	0.5	115	117.6	58.8	7.66812	0.00869565	115	7.75431	0.0085034	7.23078e-05	0.0085034	0.0932505	0.0922139	1	1.95578	0.715055	0.707107	2	0.707107	2	1	1	0.511304	0.715055	0.977891	0.0932505	0.0922139	1
		1	114	117.6	117.6	10.8444	0.00877193	115	10.9663	0.00857799	7.29421e-05	0.00854062	0.0936586	0.0926175	1.00877	0.969388	1.01567	1	0.991304	1.00438	2	0.991304	1.00438	1.02261	1.01124	0.977891	0.0936586	0.0926175	1.00438
		2	113	117.6	235.2	15.3362	0.00884956	115	15.5086	0.0086539	7.35876e-05	0.00857832	0.0940721	0.0930264	1.0177	0.480442	1.44271	1.41421	0.491304	1.42667	2	0.982609	1.00881	2.04522	1.43011	0.977891	0.0940721	0.0930264	1.00881
		5	109.2	117.6	588	24.2487	0.00915751	115	24.5213	0.00895505	7.61484e-05	0.0087263	0.0956949	0.0946311	1.05311	0.185714	2.32048	2.23607	0.189913	2.29468	2	0.949565	1.02621	5.11304	2.2612	0.977891	0.0956949	0.0946311	1.02621
		10	105	117.6	1176	34.2929	0.00952381	115	34.6783	0.00931325	7.91943e-05	0.00889912	0.09759	0.0965052	1.09524	0.0892857	3.34664	3.16228	0.0913043	3.30944	2	0.913043	1.04654	10.2261	3.19783	0.977891	0.09759	0.0965052	1.04654
		20	97	117.6	2352	48.4974	0.0103093	115	49.0426	0.0100814	8.57258e-05	0.00925882	0.101535	0.100406	1.18557	0.0412415	4.92417	4.47214	0.0421739	4.86943	2	0.843478	1.08884	20.4522	4.52241	0.977891	0.101535	0.100406	1.08884
		30	93	117.6	3528	59.397	0.0107527	115	60.0647	0.010515	8.94129e-05	0.00945584	0.103695	0.102542	1.23656	0.0263605	6.15918	5.47723	0.0269565	6.09071	2	0.808696	1.11201	30.6783	5.5388	0.977891	0.103695	0.102542	1.11201
	D1	Hard Carbon Wrapped Na3V2(PO4)3@C Porous Composite Extending Cycling Lifespan for Sodium-Ion Batteries
	APR	C-rate	Capacity	th C (mAh/g)	rate	rate^0.5	1/C	C-max	Rr^0.5	1/Cr	1/Cr0	1/C0^0.5	1/C^0.5	1/Cr^0.5	1/Crr	t	1/t^0.5	CR^0.5	tr = t*C-rate	1/tr^0.5	tr max	trr = tr/APR	1/trr^0.5	CRr=CR/APR	CRr^0.5	APR	1/C^0.5	1/Cr^0.5	1/Crr^0.5
	0.956633	1	112.5	117.6	117.6	10.8444	0.00888889	112.5	11.0874	0.0085034	7.23078e-05	0.0085034	0.0942809	0.0922139	1	0.956633	1.02242	1	1	1	1	1	1	1.04533	1.02242	0.956633	0.0942809	0.0922139	1
		2	110.6	117.6	235.2	15.3362	0.00904159	112.5	15.68	0.00864948	7.355e-05	0.00857613	0.0950873	0.0930026	1.01718	0.470238	1.45828	1.41421	0.491556	1.42631	1	0.983111	1.00855	2.09067	1.44591	0.956633	0.0950873	0.0930026	1.00855
		5	107.2	117.6	588	24.2487	0.00932836	112.5	24.7923	0.00892381	7.58828e-05	0.00871107	0.0965834	0.0944659	1.04944	0.182313	2.34202	2.23607	0.190578	2.29068	1	0.952889	1.02442	5.22667	2.28619	0.956633	0.0965834	0.0944659	1.02442
		10	103.2	117.6	1176	34.2929	0.00968992	112.5	35.0615	0.0092697	7.88239e-05	0.00887829	0.0984374	0.0962793	1.09012	0.0877551	3.3757	3.16228	0.0917333	3.30169	1	0.917333	1.04409	10.4533	3.23316	0.956633	0.0984374	0.0962793	1.04409
		20	94.6	117.6	2352	48.4974	0.0105708	112.5	49.5845	0.0101124	8.59898e-05	0.00927307	0.102815	0.10056	1.18922	0.0402211	4.98624	4.47214	0.0420444	4.87692	1	0.840889	1.09051	20.9067	4.57238	0.956633	0.102815	0.10056	1.09051
		30	85.1	117.6	3528	59.397	0.0117509	112.5	60.7284	0.0112413	9.55891e-05	0.00977697	0.108401	0.106025	1.32197	0.0241213	6.43872	5.47723	0.0252148	6.29756	1	0.756444	1.14977	31.36	5.6	0.956633	0.108401	0.106025	1.14977
		40	74.1	117.6	4704	68.5857	0.0134953	112.5	70.1231	0.01291	0.000109779	0.0104776	0.116169	0.113622	1.51822	0.0157526	7.96755	6.32456	0.0164667	7.79287	1	0.658667	1.23216	41.8133	6.46632	0.956633	0.116169	0.113622	1.23216
		50	61.1	117.6	5880	76.6812	0.0163666	112.5	78.4	0.0156568	0.000133136	0.0115385	0.127932	0.125127	1.84124	0.0103912	9.80998	7.07107	0.0108622	9.5949	1	0.543111	1.35692	52.2667	7.22957	0.956633	0.127932	0.125127	1.35692
